# Supplementary material for: A single-cell transcriptomic atlas of exercise-induced anti-inflammatory and geroprotective effects across the body
Source: PubMed Central journal article supplement — Innovation (Camb). 2023 Jan 5;4(1):100380. doi: 10.1016/j.xinn.2023.100380 (PMC9898793; doi:10.1016/j.xinn.2023.100380), 2023-01-05

**The Innovation, Volume 4**

## **Supplemental Information**

### **A single-cell transcriptomic atlas of exercise-induced anti-inflammatory and geroprotective effects across the body**

**Shuhui Sun, Shuai Ma, Yusheng Cai, Si Wang, Jie Ren, Yuanhan Yang, Jiale Ping, Xuebao Wang, Yiyuan Zhang, Haoteng Yan, Wei Li, Concepcion Rodriguez Esteban, Yan Yu, Feifei Liu, Juan Carlos Izpisua Belmonte, Weiqi Zhang, Jing Qu, and Guang-Hui Liu**

**Figure S1**

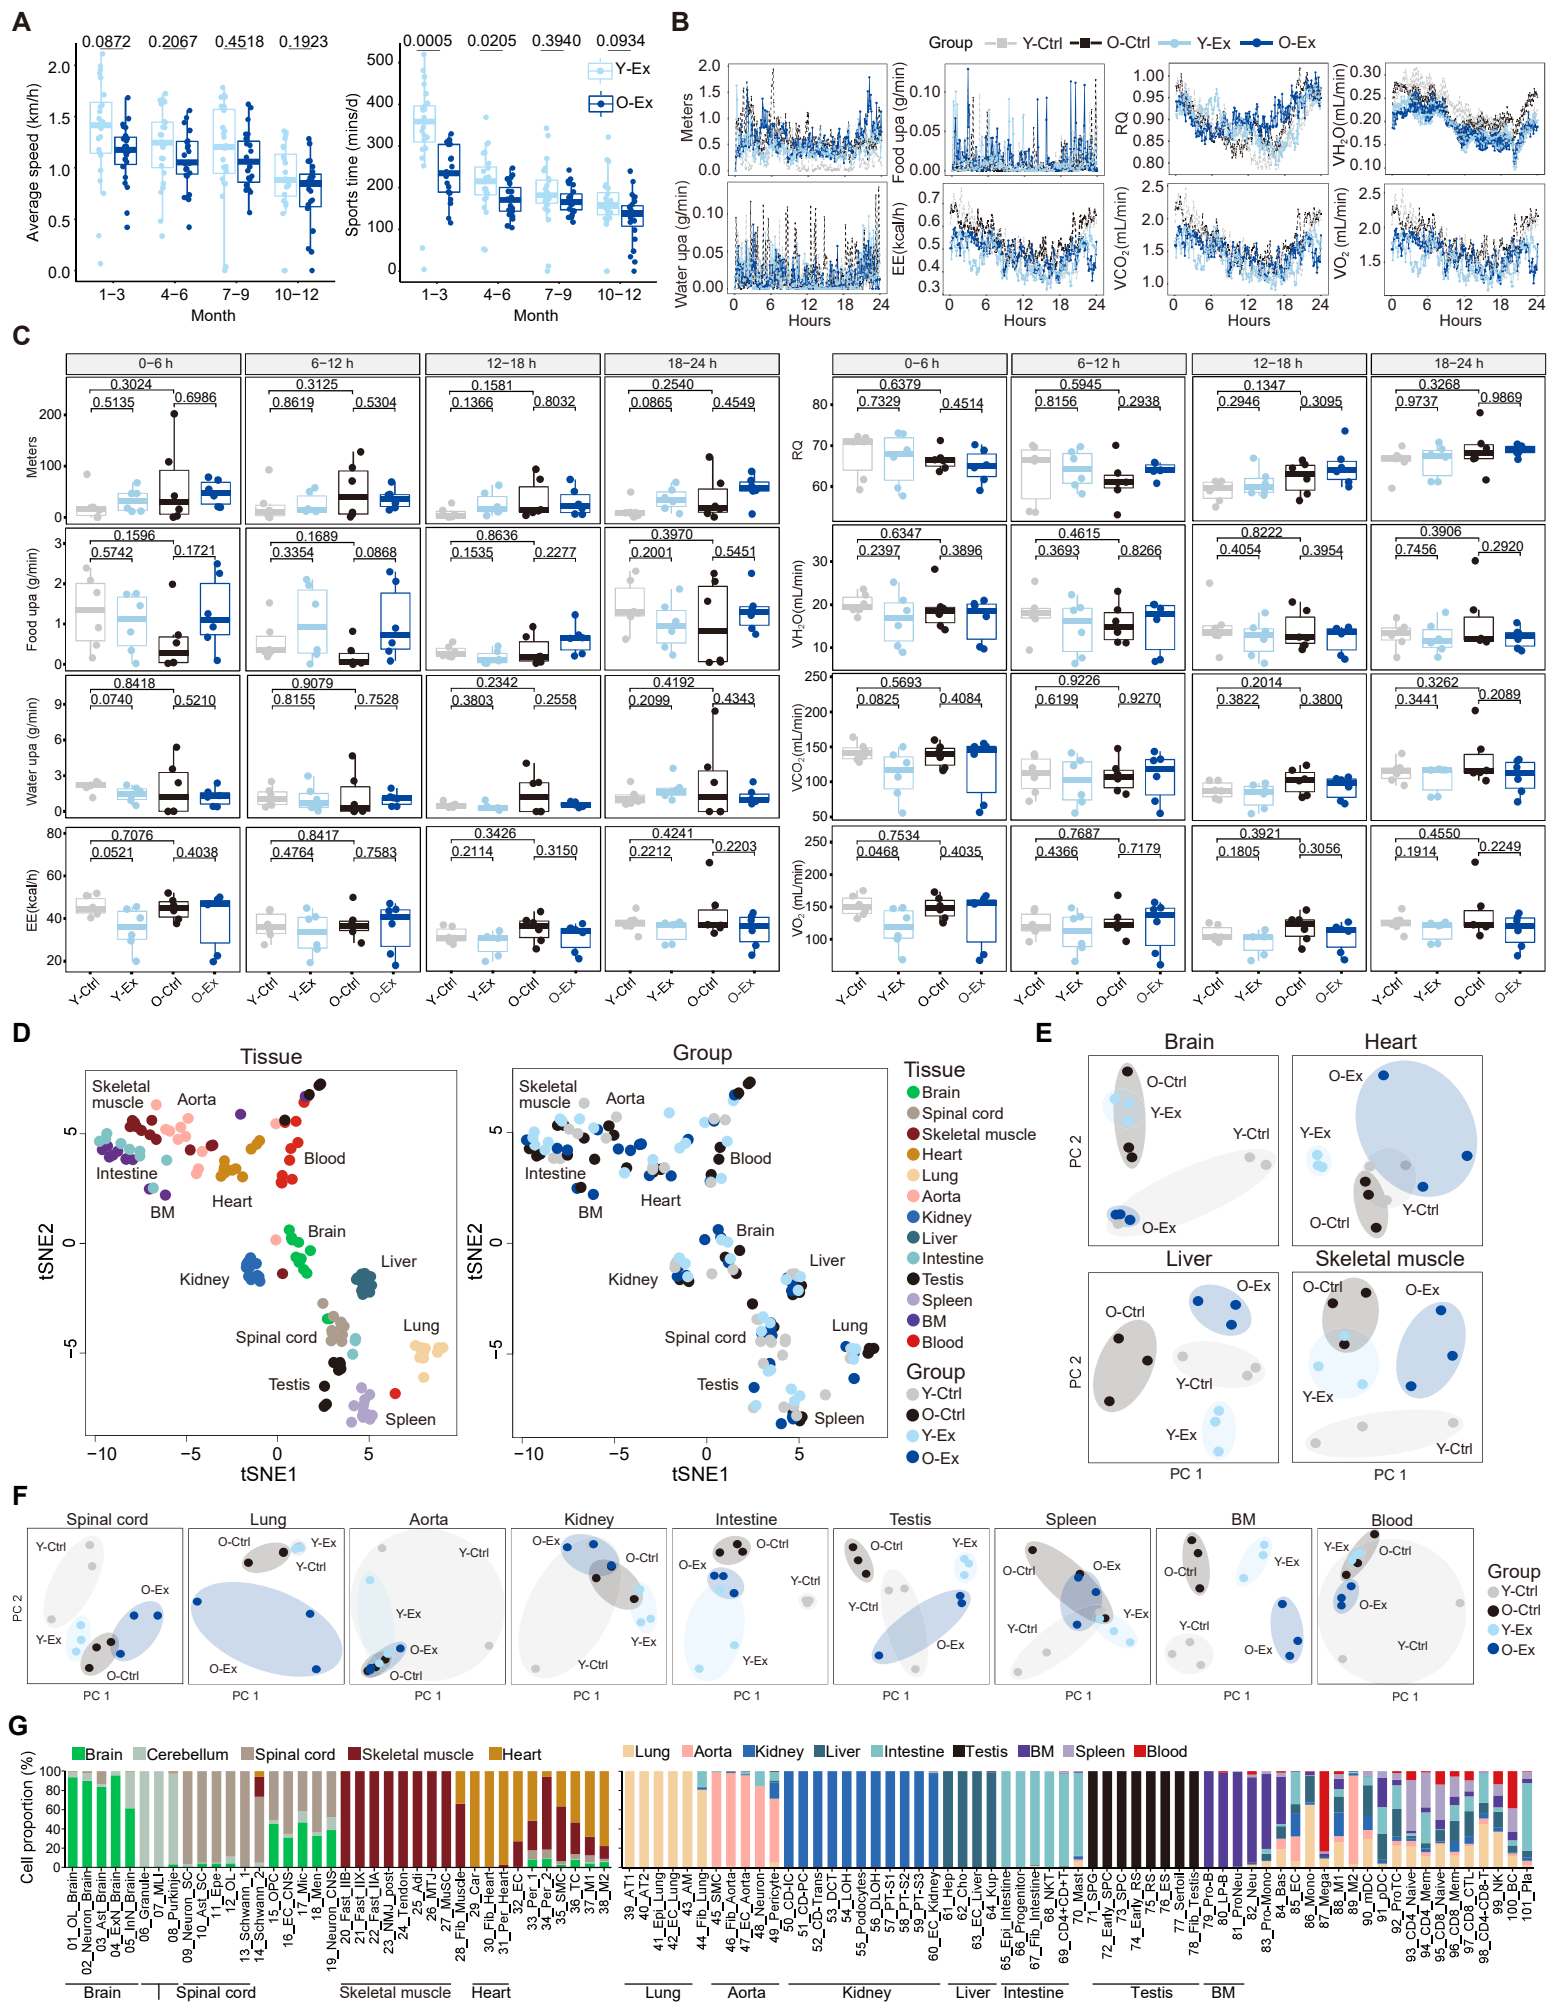

**Figure S2**

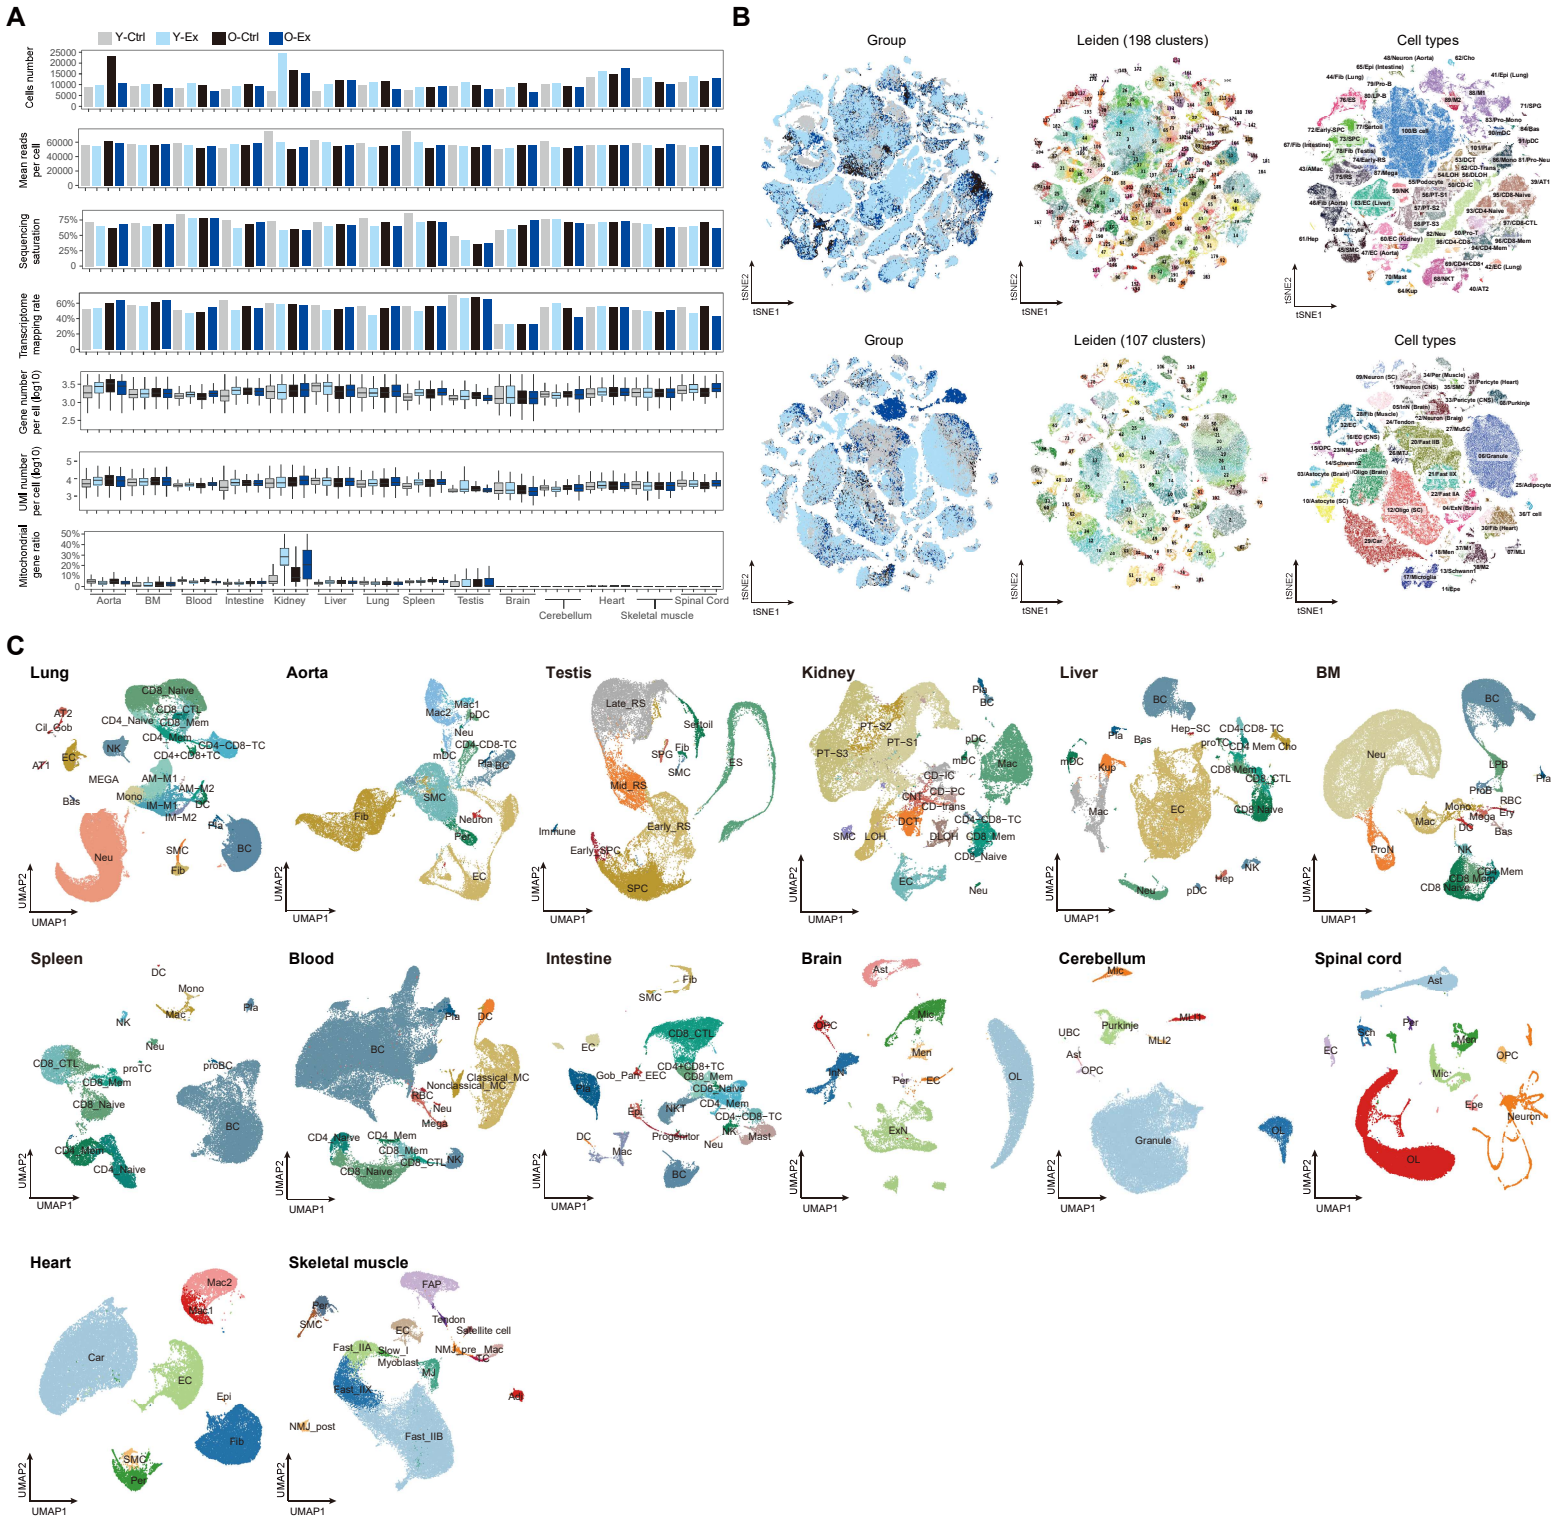

**Figure S3**

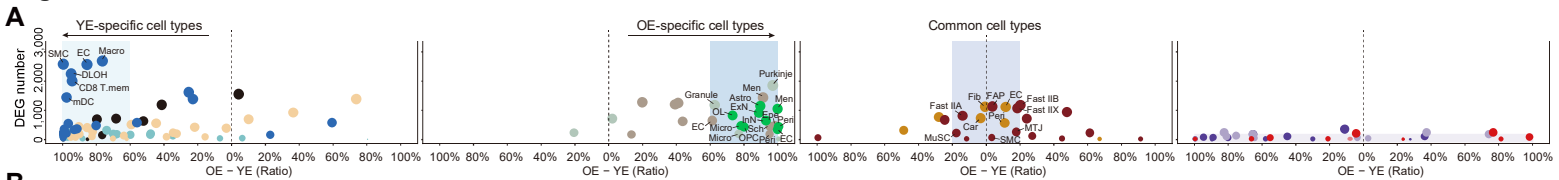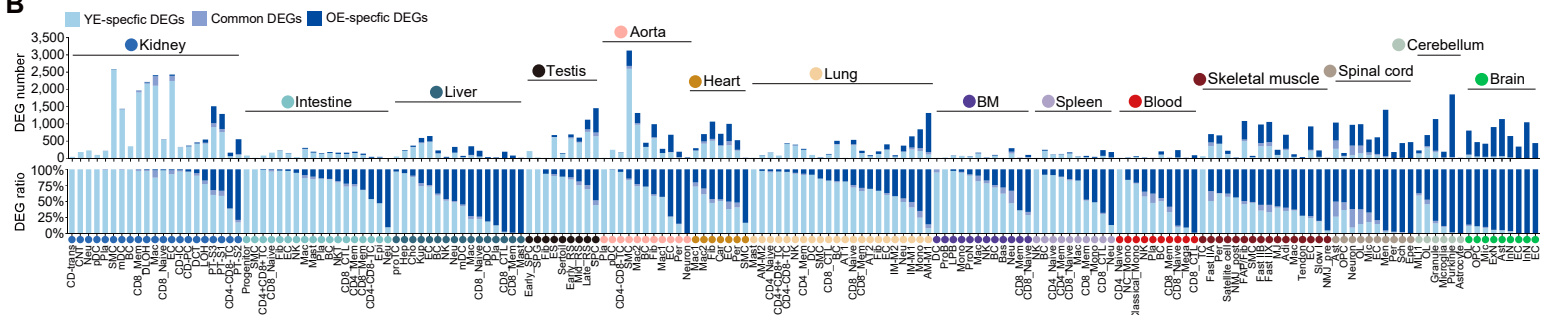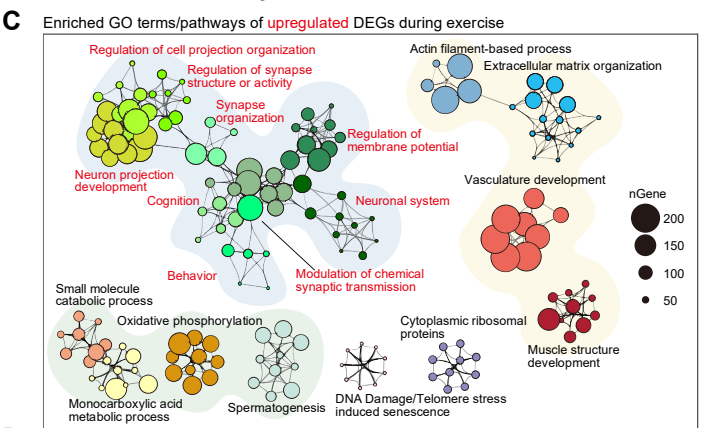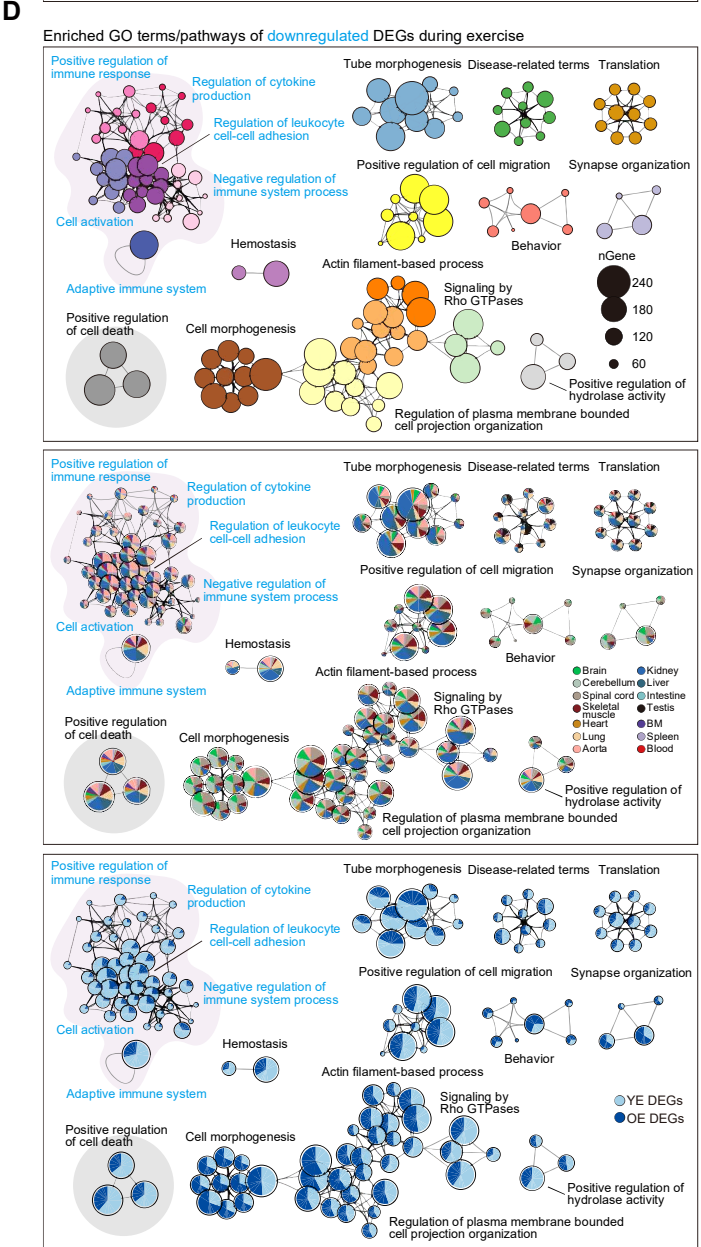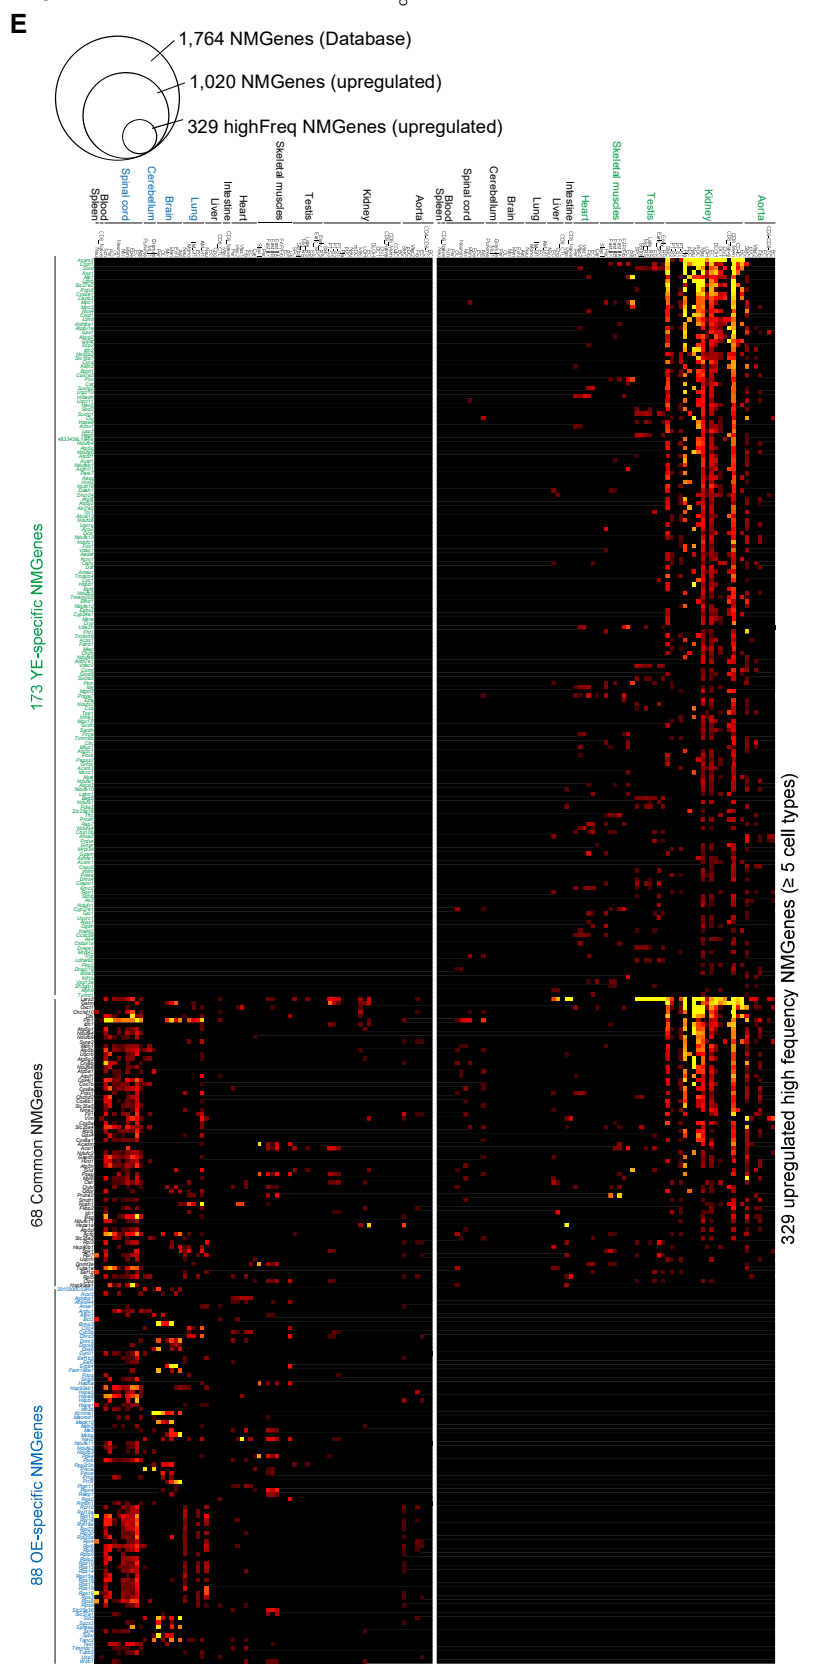

329 upregulated high frequency NMGenes (≥ 5 cell types)

**Figure S4**

**A**

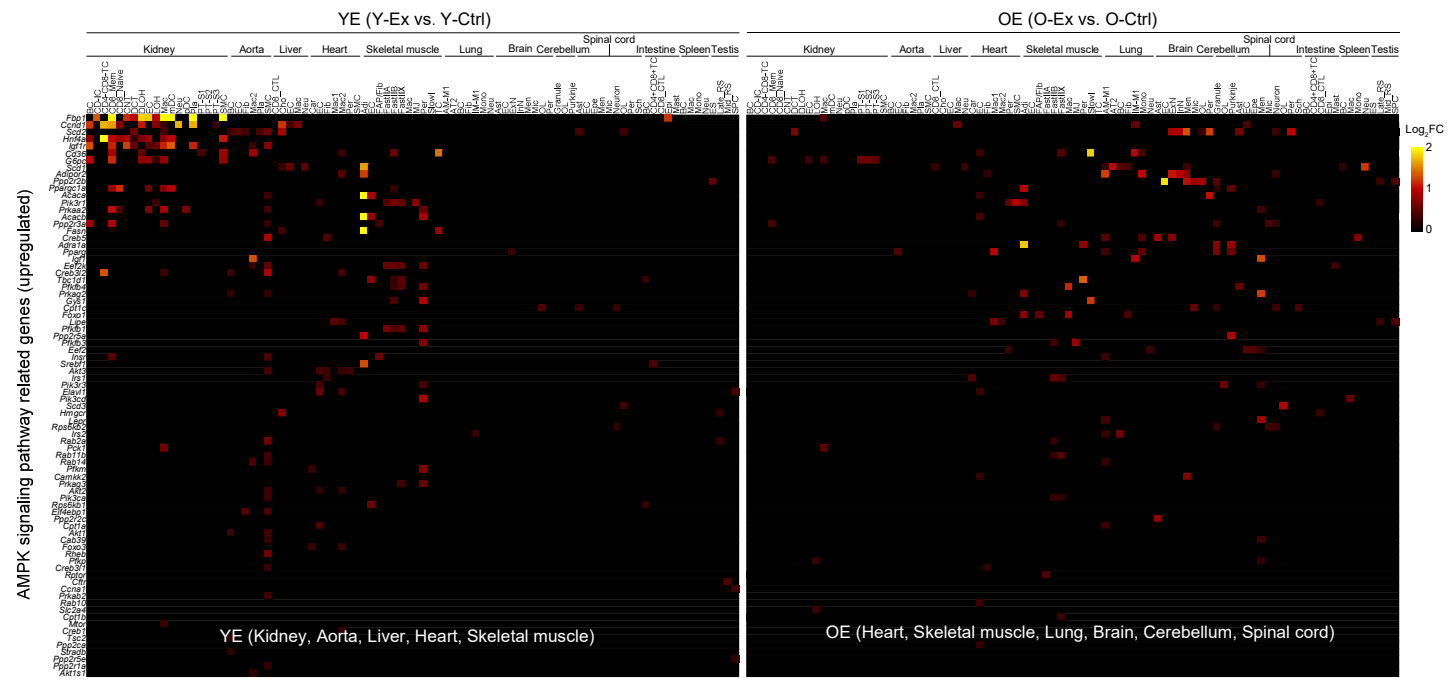

**B**

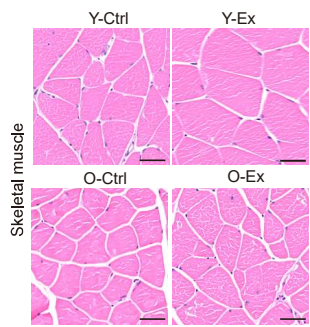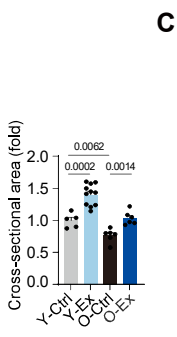

**C**

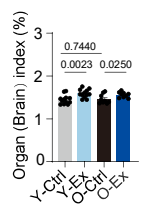

**Figure S5**

**A**

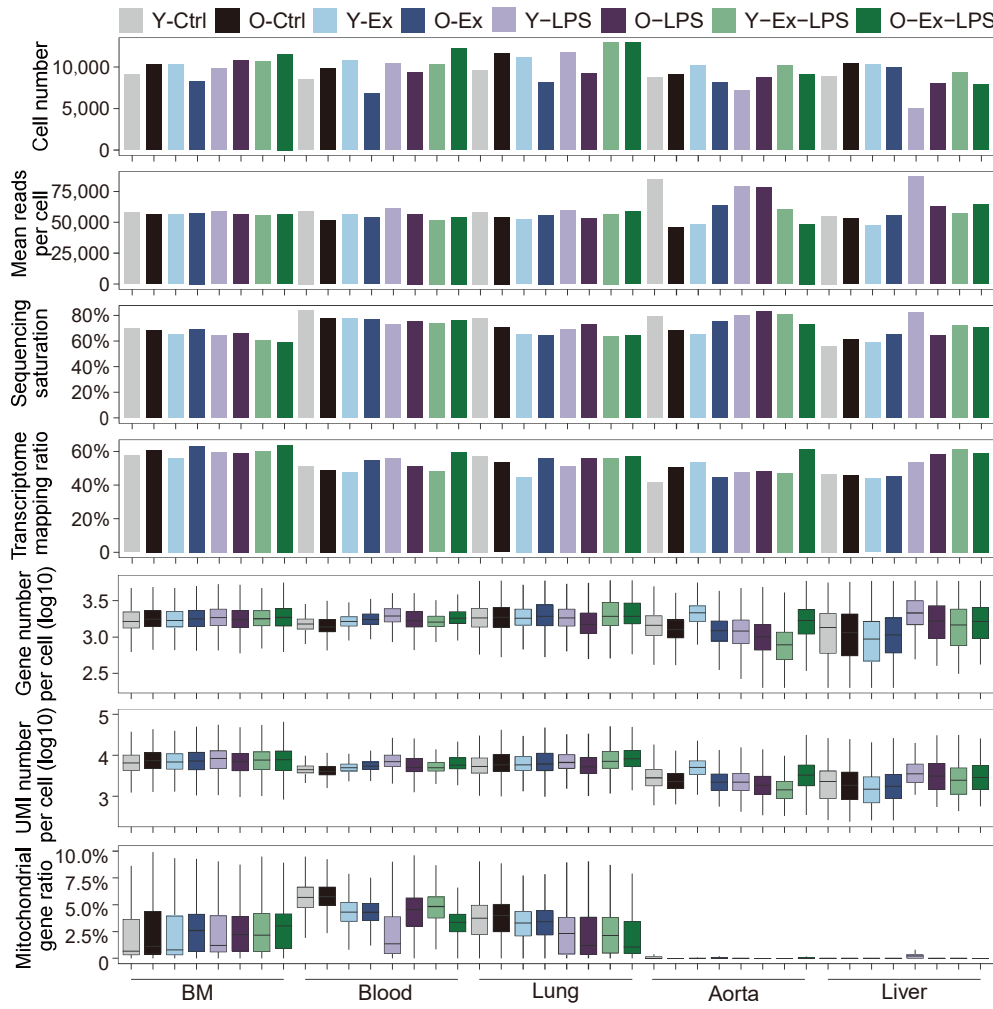

**B**

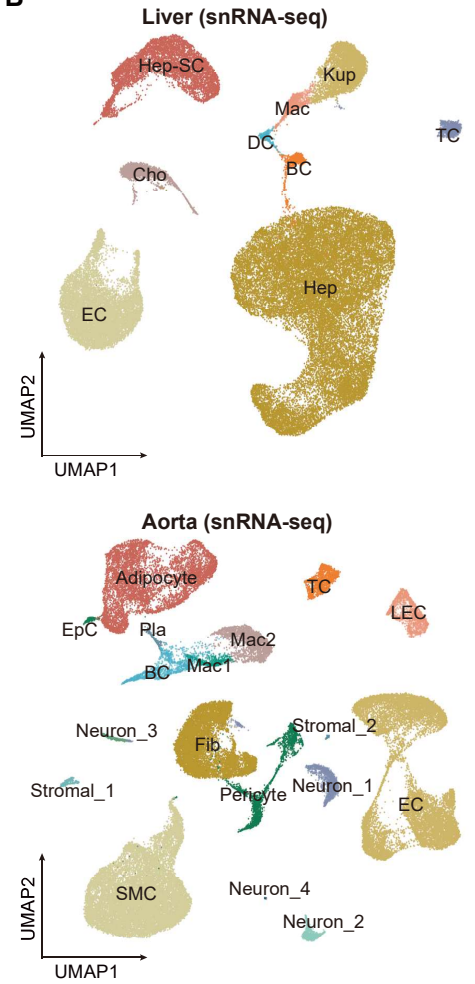

**C**

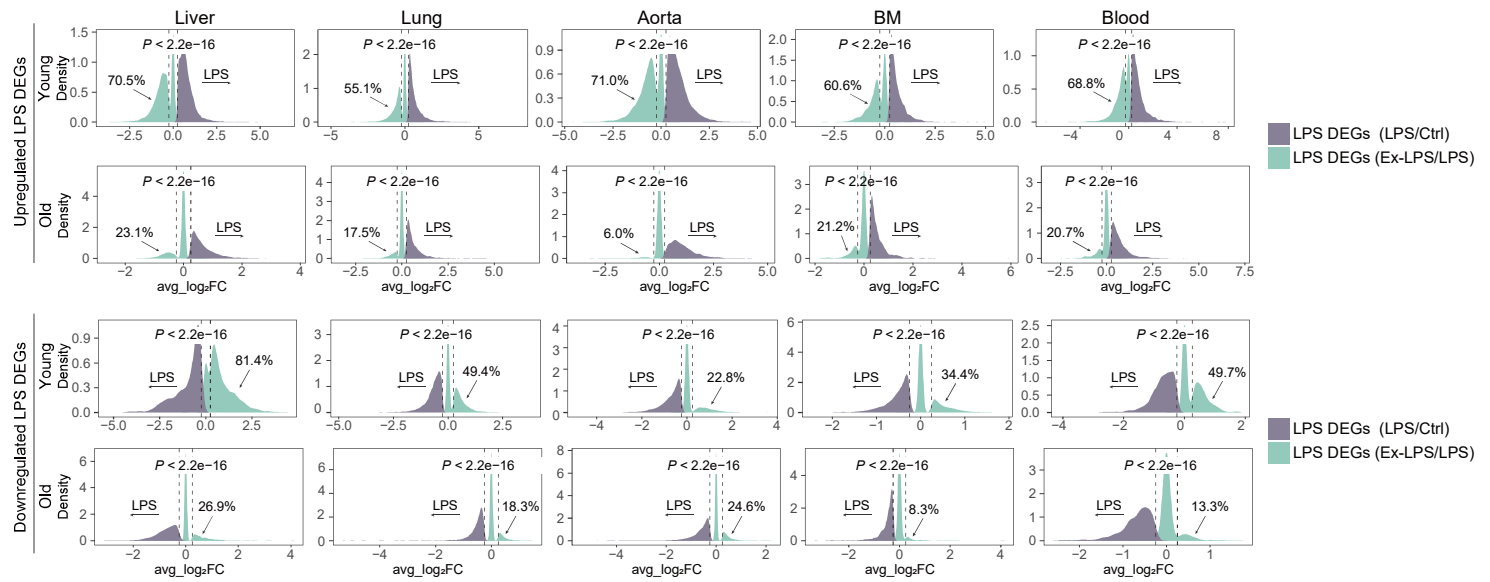

**Figure S6**

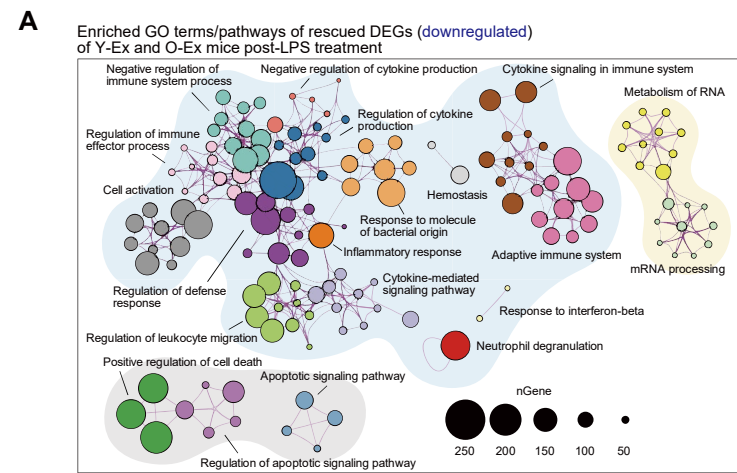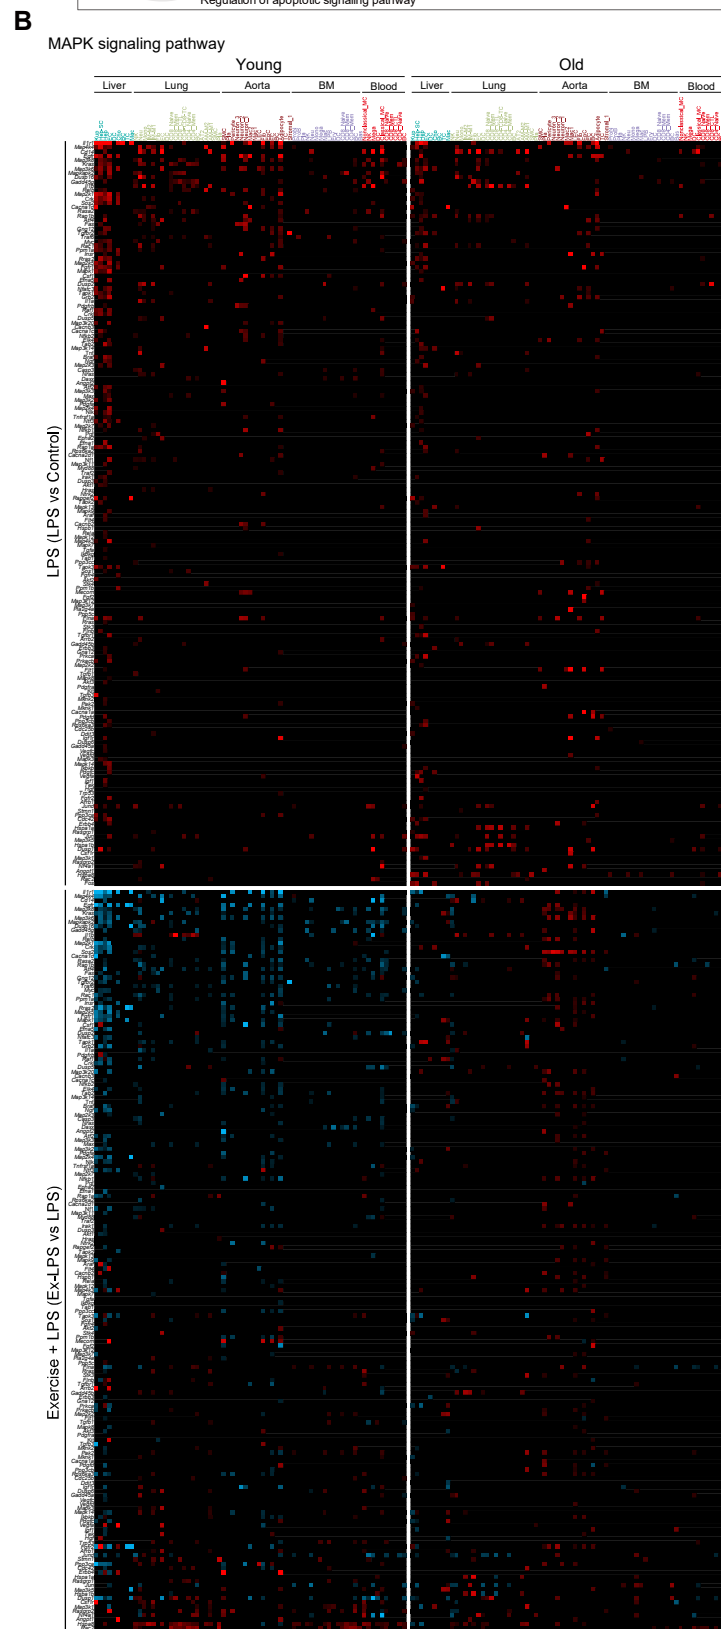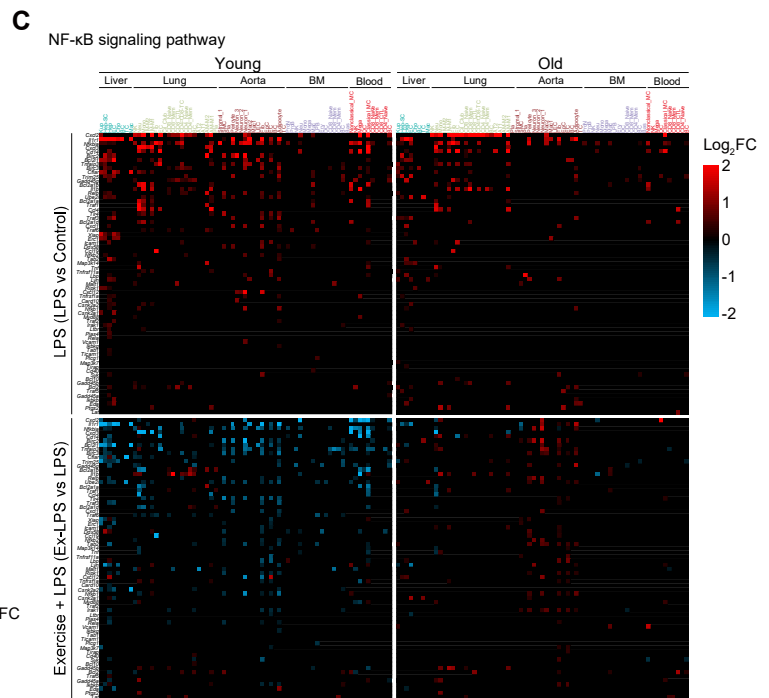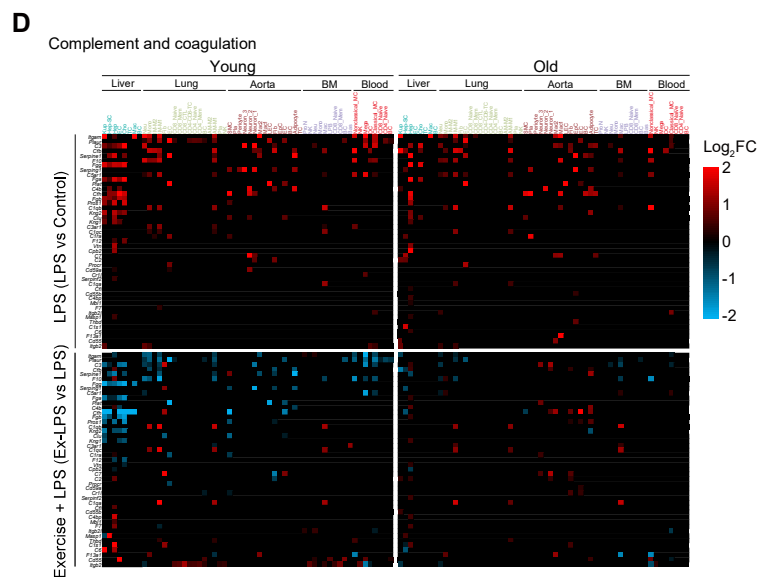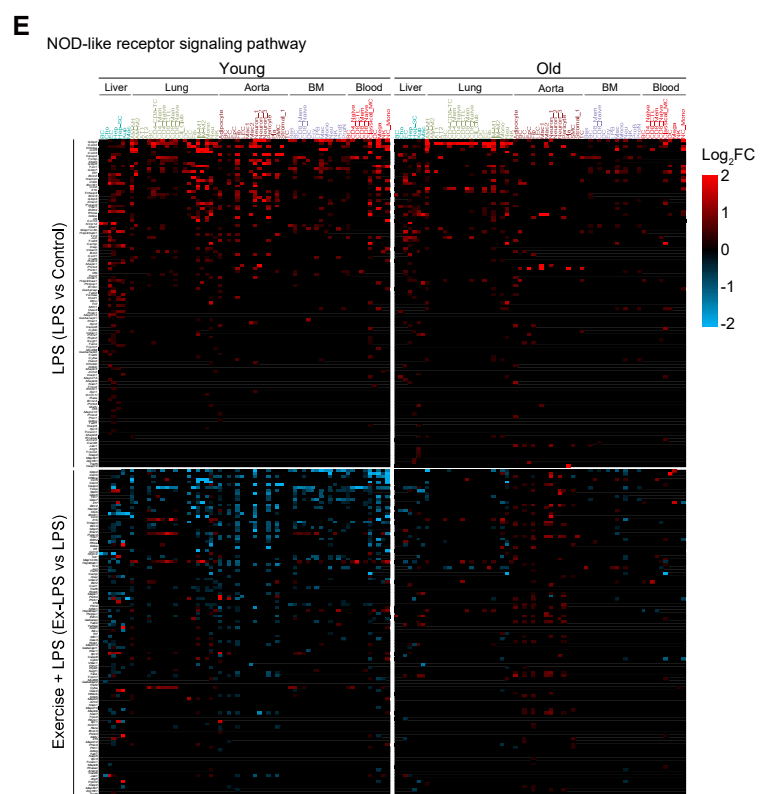

**Figure S7**

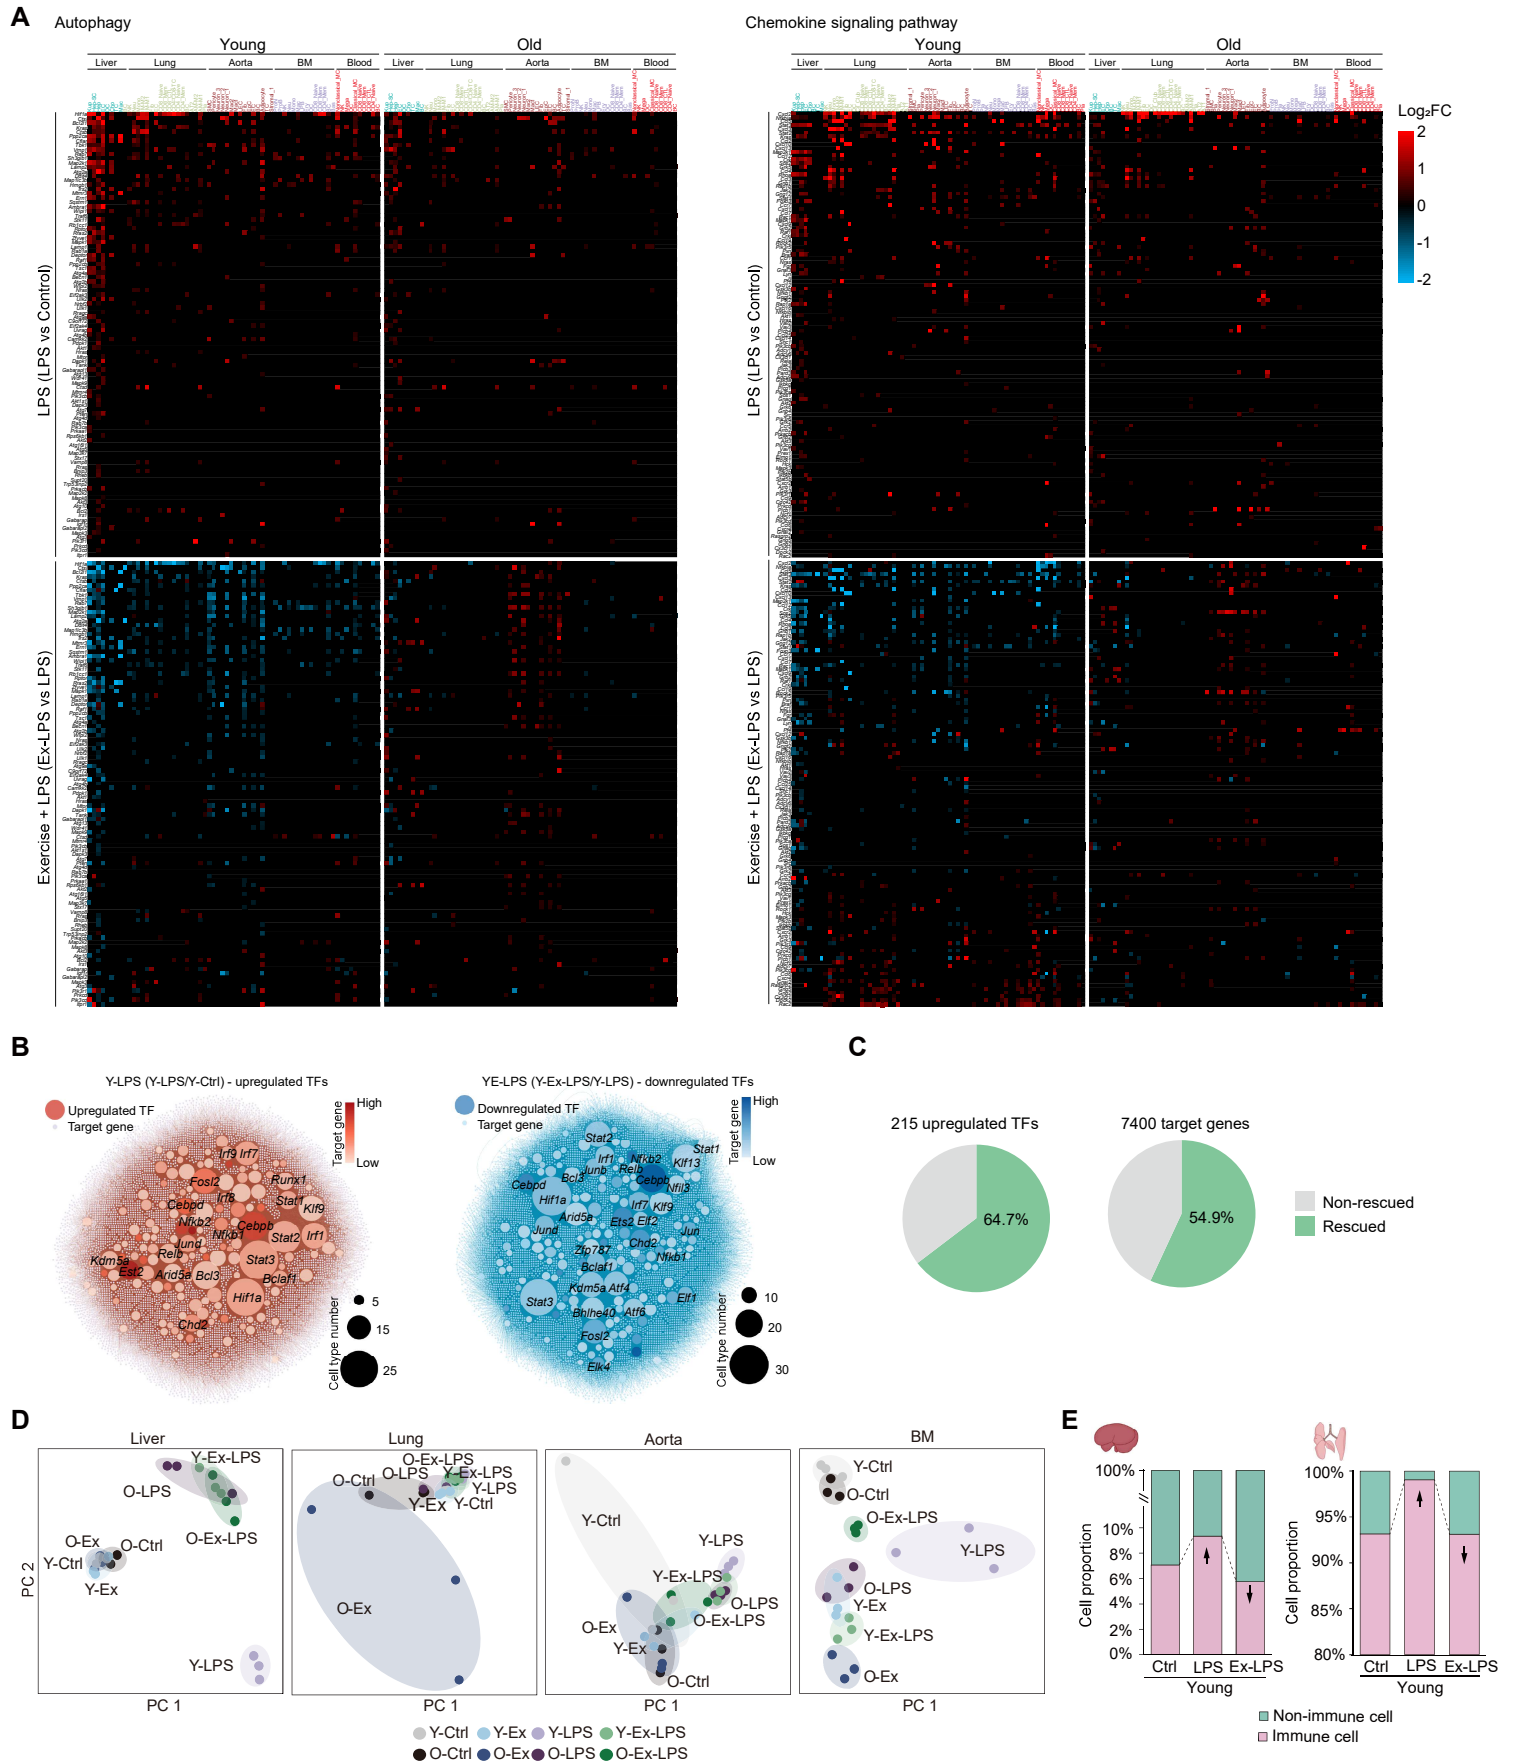



**Figure S8**

**A**

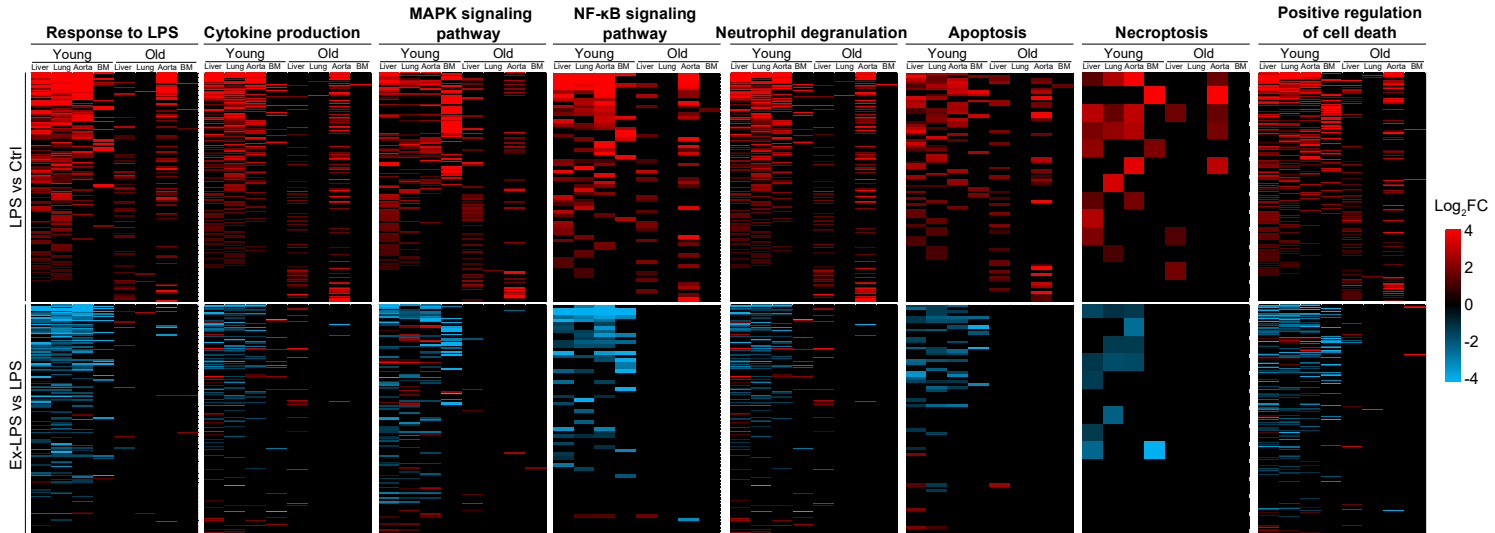

**B**

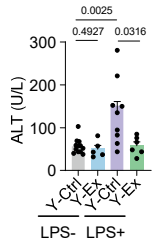

**C**

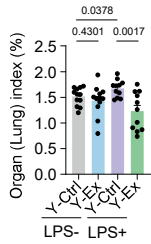

**Figure S9**

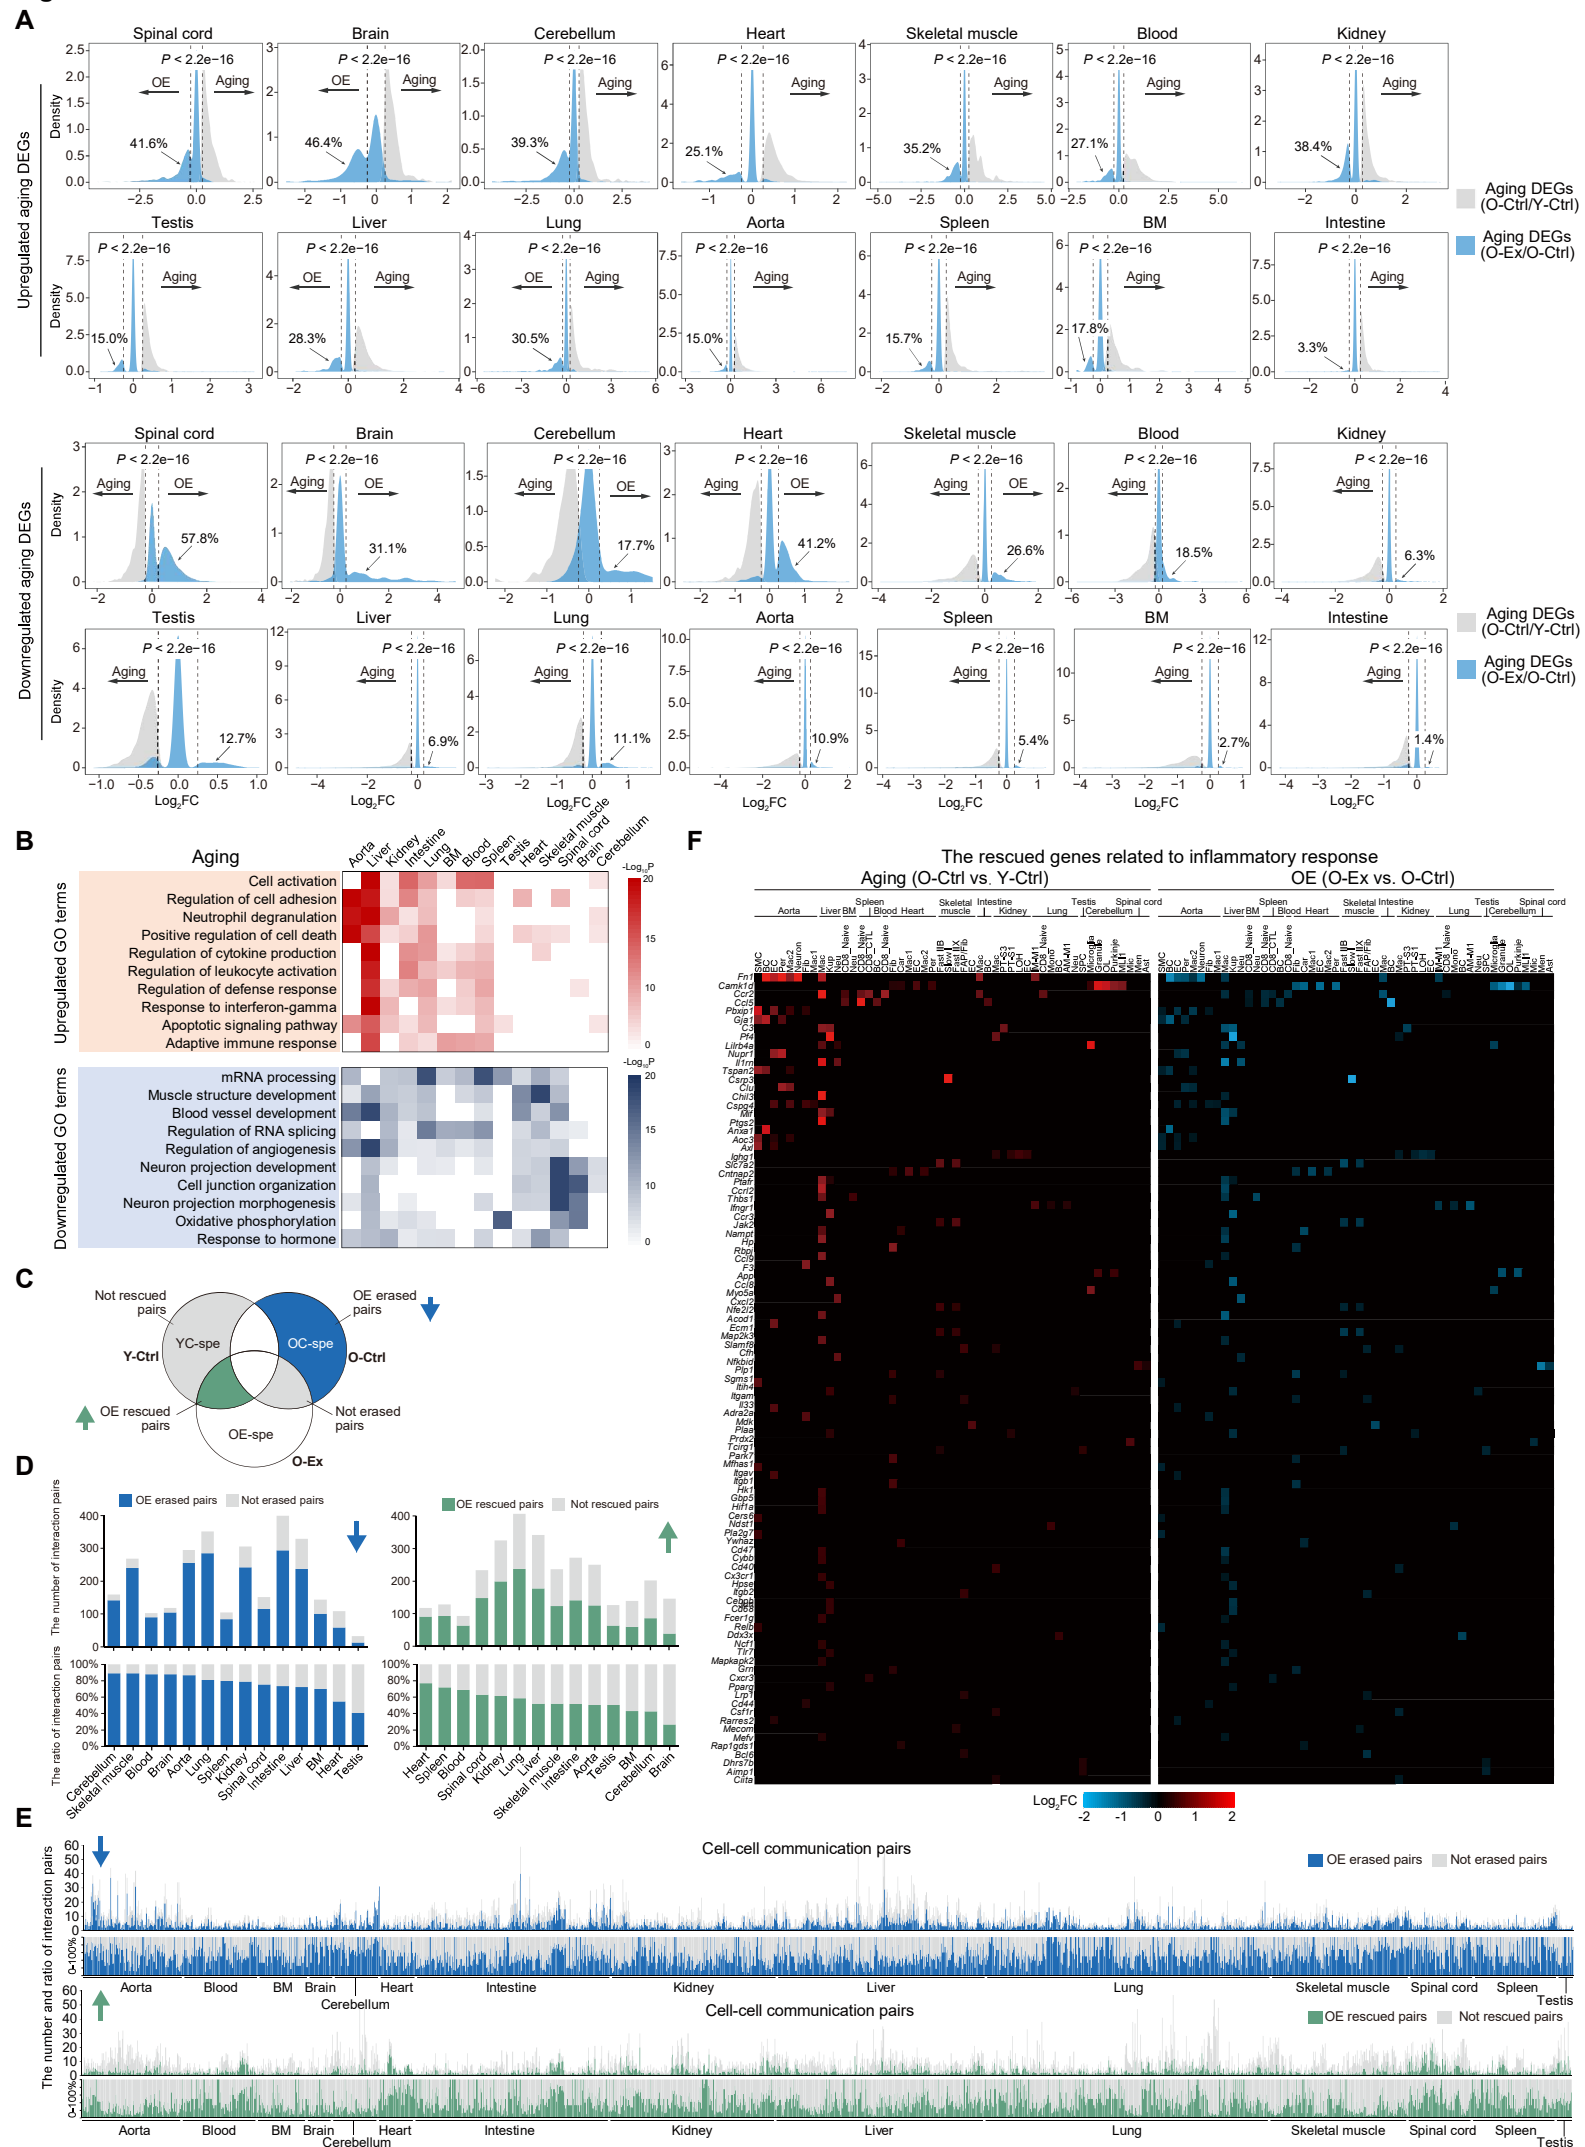

**Figure S10**

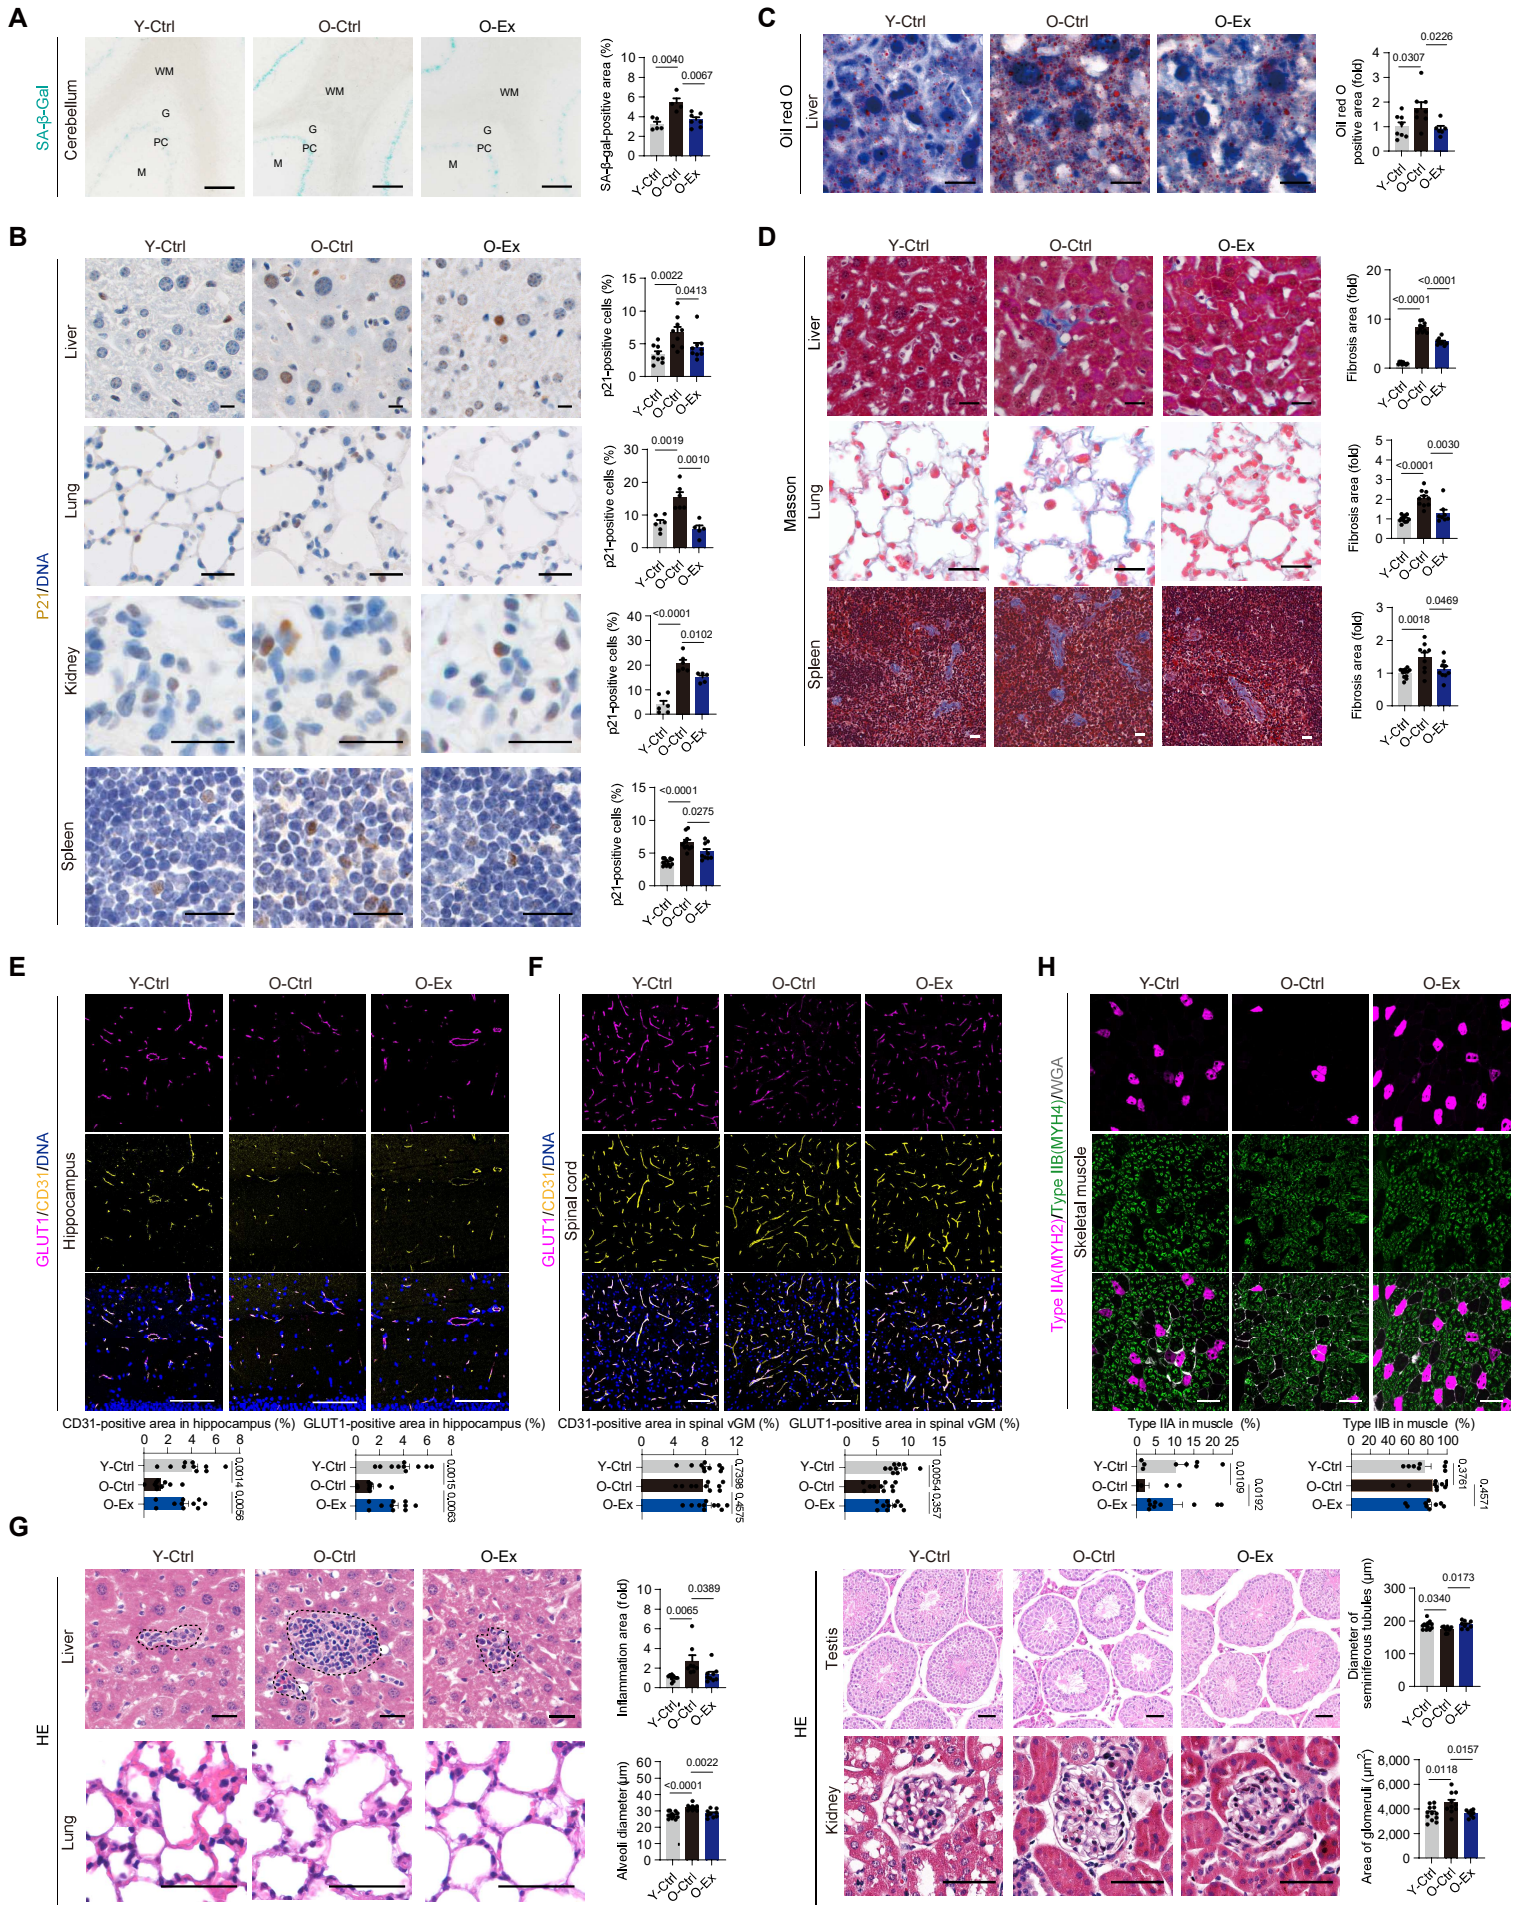

**Figure S11**

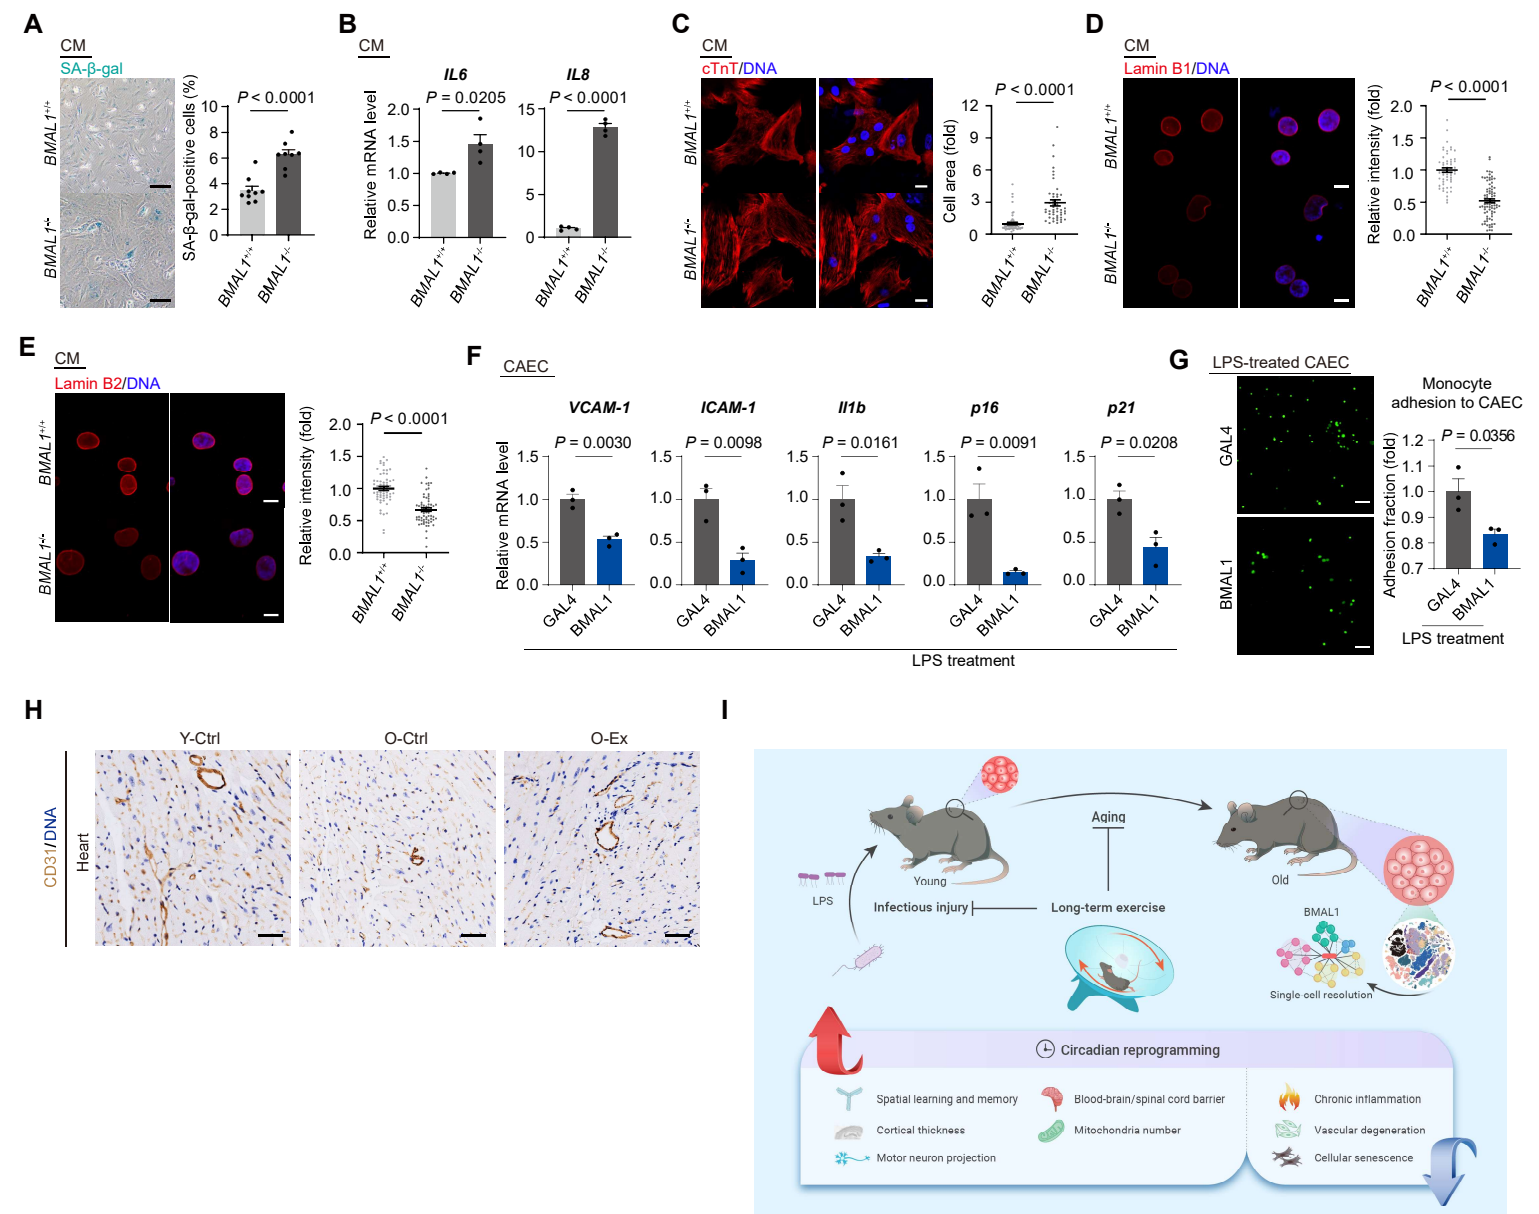

Supplement: mmc1.pdf [file mmc1.pdf]
